# Supplementary material for: The one pot synthesis of heterobimetallic complexes from a homoditopic pyrimidine–hydrazone ligand
Source: Royal Society of Chemistry journal article supplement (doi:10.1039/c3ra47735e), 2014-01-01
Supplement: c3ra47735e1.pdf [file c3ra47735e1.pdf]

## Electronic Supplementary Information for

The one pot synthesis of heterobimetallic complexes from a homoditopic pyrimidine-hydrazone  
ligand

*Daniel J. Hutchinson, Lyall R. Hanton,\* and Stephen C. Moratti*

Department of Chemistry, University of Otago, PO Box 56, Dunedin, New Zealand,

\*E-mail: lhanton@chemistry.otago.ac.nz

**Figures S1-S3.** Thermal ellipsoid views of complexes **1-3**.

**Tables S1-S3.** Selected bond lengths (Å) and angles (°) of complexes **1-3**.

**Discussion of Disorder.** Complexes **2** and **3** contained  $\text{SO}_3\text{CF}_3^-$  anions which were disordered over two sites. The site occupancy factors for the major components of the disordered anions in complexes **2** and **3** were 0.50, and 0.80, respectively.

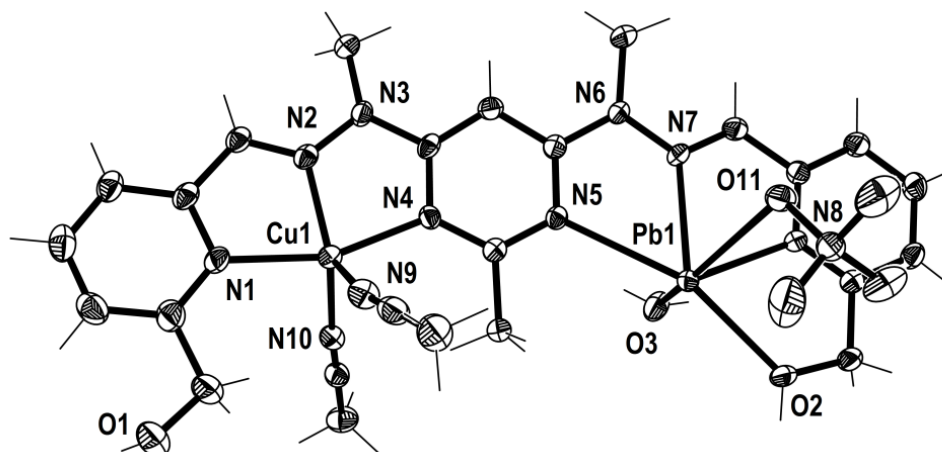

**Figures S1.** View of the  $[\text{CuPbL1}(\text{ClO}_4)(\text{CH}_3\text{CN})_2(\text{H}_2\text{O})]^{3+}$  cation of complex **1** (crystallographic numbering). Thermal ellipsoids are drawn at the 50 % probability level.

**Table S1.** Selected bond lengths (Å) and angles (°) of  $[\text{CuPbL1}(\text{ClO}_4)(\text{CH}_3\text{CN})_2(\text{H}_2\text{O})](\text{ClO}_4)_3$  (**1**).

|         |          |           |          |            |            |
|---------|----------|-----------|----------|------------|------------|
| Cu1-N1  | 2.053(5) | Pb1-N8    | 2.507(5) | N2-Cu1-N10 | 124.9(2)   |
| Cu1-N2  | 1.952(5) | Pb1-O2    | 2.552(4) | N9-Cu1-N10 | 110.9(2)   |
| Cu1-N4  | 2.009(5) | Pb1-O11   | 2.710(4) | N5-Pb1-N7  | 59.70(19)  |
| Cu1-N9  | 2.027(5) | Pb1-O3    | 2.411(4) | N7-Pb1-N8  | 65.52(15)  |
| Cu1-N10 | 2.063(6) | N1-Cu1-N2 | 80.1(2)  | N8-Pb1-O2  | 62.66(14)  |
| Pb1-N5  | 2.709(5) | N2-Cu1-N4 | 79.6(2)  | O2-Pb1-N5  | 152.76(15) |
| Pb1-N7  | 2.563(5) | N1-Cu1-N4 | 159.7(2) | O11-Pb1-O3 | 145.04(16) |

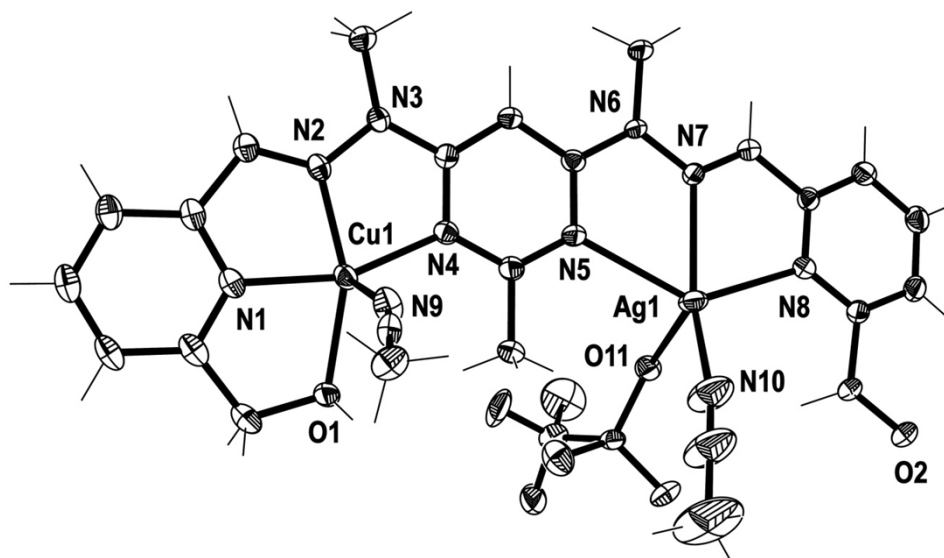

**Figure S2.** View of the  $[\text{CuAgL1}(\text{SO}_3\text{CF}_3)(\text{CH}_3\text{CN})_2]^{2+}$  cation of complex **2** (crystallographic numbering). Thermal ellipsoids are drawn at the 50 % probability level.

**Table S2.** Selected bond lengths (Å) and angles (°) of  $[\text{CuAgL1}(\text{SO}_3\text{CF}_3)(\text{CH}_3\text{CN})_2](\text{SO}_3\text{CF}_3)_2 \cdot \text{CH}_3\text{CN}$  (**2**).

|        |            |           |           |             |            |
|--------|------------|-----------|-----------|-------------|------------|
| Cu1-N1 | 1.935(2)   | Ag1-N8    | 2.398(2)  | N1-Cu1-N4   | 158.15(9)  |
| Cu1-N2 | 1.964(2)   | Ag1-N10   | 2.197(3)  | N2-Cu1-O1   | 157.56(8)  |
| Cu1-N4 | 1.988(2)   | Ag1-O11   | 2.593(7)  | N5-Ag1-N7   | 64.90(7)   |
| Cu1-N9 | 2.229(2)   | N1-Cu1-N2 | 80.03(9)  | N7-Ag1-N8   | 69.55(7)   |
| Cu1-O1 | 2.0964(19) | N2-Cu1-N4 | 79.34(8)  | N7-Ag1-N10  | 148.89(11) |
| Ag1-N5 | 2.480(2)   | N4-Cu1-O1 | 120.13(8) | N5-Ag1-N8   | 134.15(7)  |
| Ag1-N7 | 2.391(2)   | N1-Cu1-N9 | 97.04(8)  | N10-Ag1-O11 | 101.51(17) |

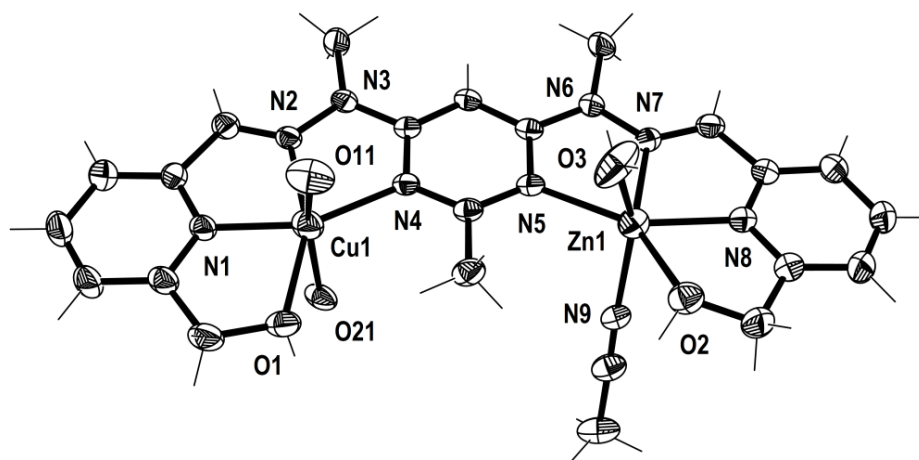

**Figure S3.** View of the  $[\text{CuZnL1}(\text{SO}_3\text{CF}_3)_2(\text{CH}_3\text{CN})(\text{H}_2\text{O})]^{2+}$  cation of complex **3** (crystallographic numbering). Thermal ellipsoids are drawn at the 50 % probability level (the  $\text{SO}_3\text{CF}_3^-$  anions coordinated to Cu1 have been simplified to O11 and O21 for clarity).

**Table S3.** Selected bond lengths (Å) and angles (°) of  $\text{CuZnL1}(\text{SO}_3\text{CF}_3)_2(\text{CH}_3\text{CN})(\text{H}_2\text{O})[(\text{SO}_3\text{CF}_3)_2 \cdot \text{CH}_3\text{CN}]$  (**3**).

|         |          |           |           |             |            |
|---------|----------|-----------|-----------|-------------|------------|
| Cu1-N1  | 1.967(3) | Zn1-N7    | 2.126(3)  | N4-Cu1-O1   | 125.11(13) |
| Cu1-N2  | 2.032(3) | Zn1-N8    | 2.058(3)  | O11-Cu1-O21 | 161.71(13) |
| Cu1-N4  | 2.028(3) | Zn1-N9    | 2.098(3)  | N5-Zn1-N7   | 73.36(12)  |
| Cu1-O1  | 2.102(3) | Zn1-O2    | 2.237(3)  | N7-Zn1-N8   | 75.78(13)  |
| Cu1-O11 | 2.257(3) | Zn1-O3    | 2.063(4)  | N8-Zn1-O2   | 72.64(13)  |
| Cu1-O21 | 2.269(3) | N1-Cu1-N2 | 78.60(13) | O2-Zn1-N5   | 138.10(12) |
| Zn1-N5  | 2.140(3) | N2-Cu1-N4 | 77.94(12) | N9-Zn1-O3   | 145.70(19) |
